# Supplementary material
Source: Springer Nature journal article supplement (https://www.springermedizin.de/resource/supplementary/12936_2012_2537_MOESM1_ESM.pdf/9543208)

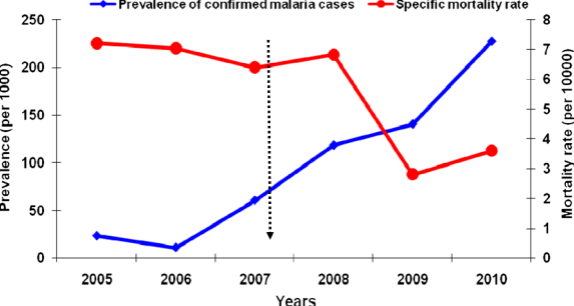

Supplement: MOESM1 [file 9543208]
